# Supplementary material for: Precise synthesis of poly(N-acryloyl amino acid) through photoinduced living polymerization
Source: Royal Society of Chemistry journal article supplement (doi:10.1039/c8py00366a), 2018-01-01
Supplement: c8py00366a1.pdf [file c8py00366a1.pdf]

## Supporting Information

### Precise Synthesis of Poly(*N*-Acryloyl Amino Acid) Through Photoinduced Living Polymerization

Guofeng Li,<sup>a,b</sup> Wenli Feng,<sup>a</sup> Nathaniel Corrigan,<sup>b</sup> Cyrille Boyer,<sup>b</sup> Xing Wang,<sup>a,\*</sup> and Jiangtao Xu<sup>b,\*</sup>

<sup>a</sup>Beijing Advanced Innovation Center for Soft Matter Science and Engineering, Beijing Laboratory of Biomedical Materials, Beijing University of Chemical Technology, Beijing 100029, P. R. China

<sup>b</sup>Centre for Advanced Macromolecular Design and Australian Centre for NanoMedicine, School of Chemical Engineering, University of New South Wales, Sydney 2052, Australia

#### 1. PET-RAFT polymerization of *N*-Acryloyl-*DL*-Val-OMe (V-OMe)

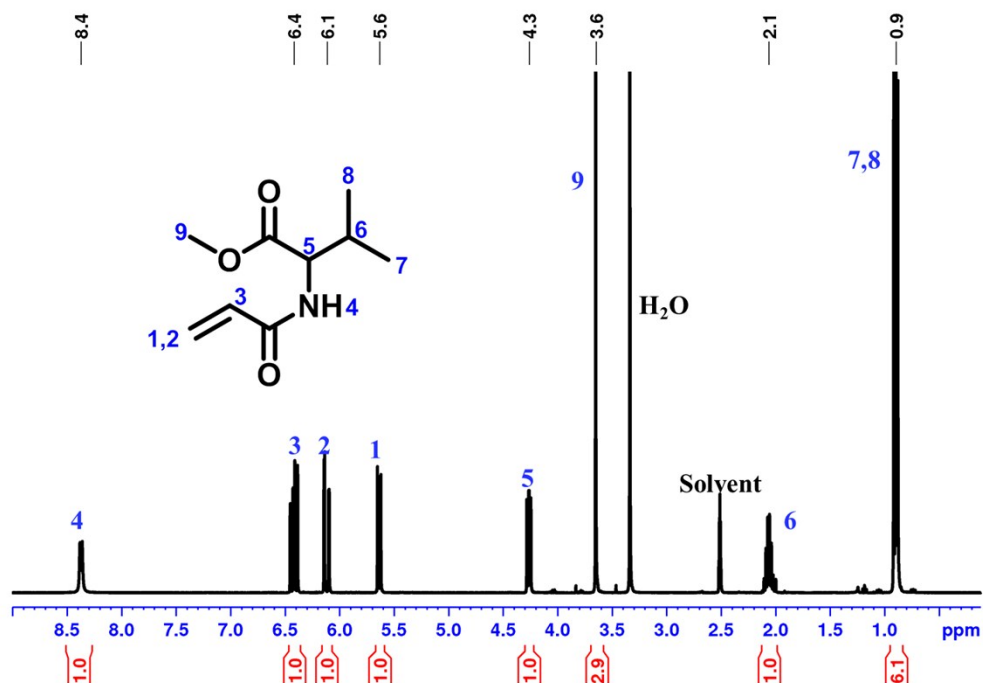

**Figure S1.** <sup>1</sup>H NMR spectrum of V-OMe monomer (400 MHz, DMSO-*d*<sub>6</sub> as solvent).

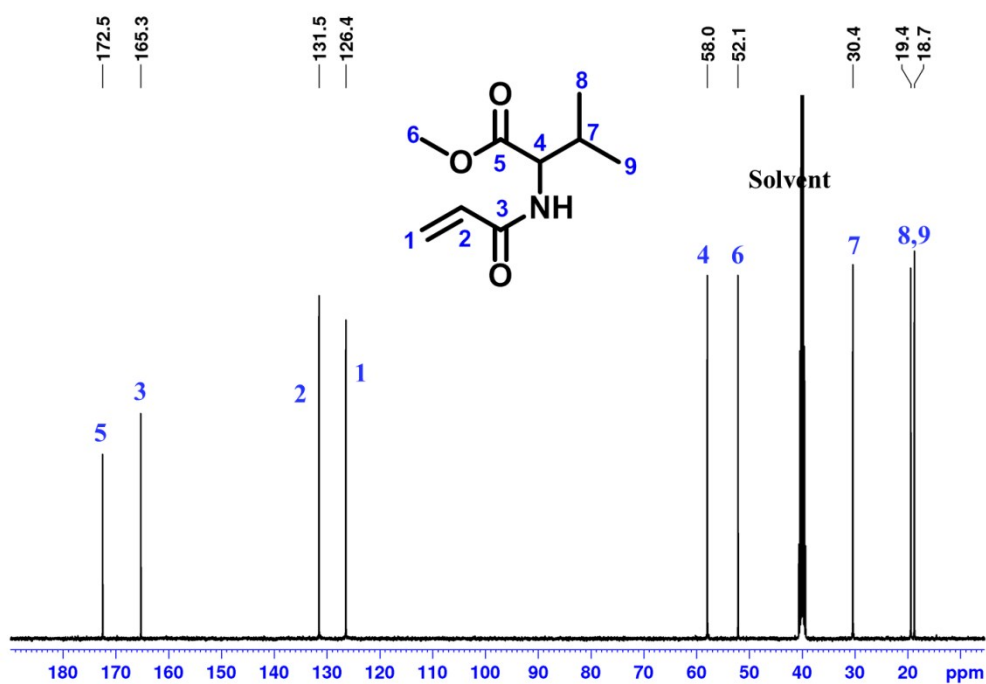

**Figure S2.** <sup>13</sup>C NMR spectrum of V-OMe monomer (100 MHz, DMSO-*d*<sub>6</sub> as solvent).

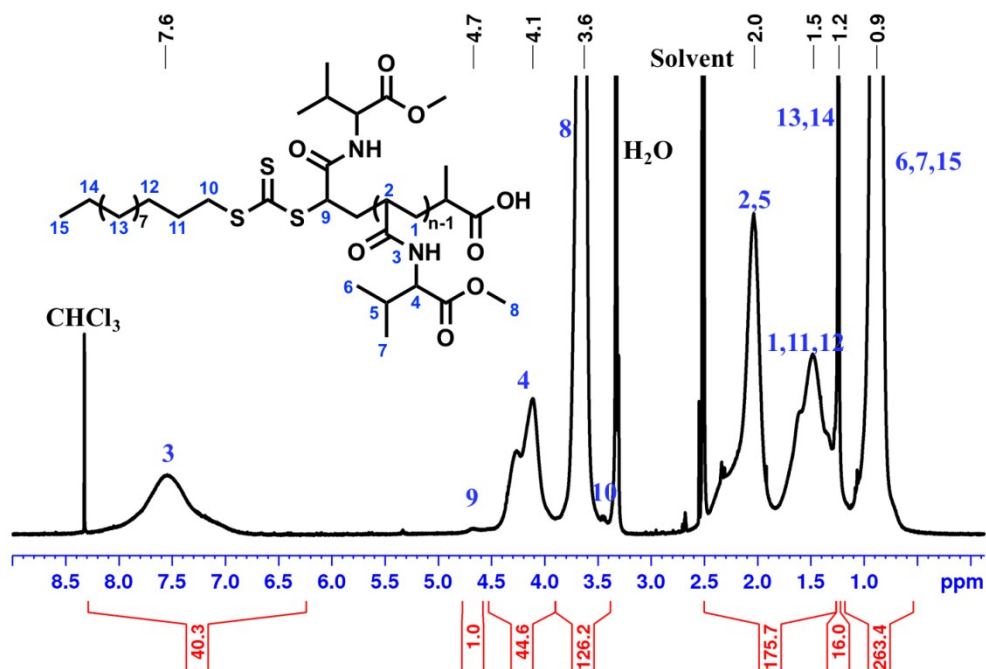

**Figure S3.** <sup>1</sup>H NMR spectrum of poly(V-OMe) (PV-OMe) (400 MHz, DMSO-*d*<sub>6</sub> as solvent).

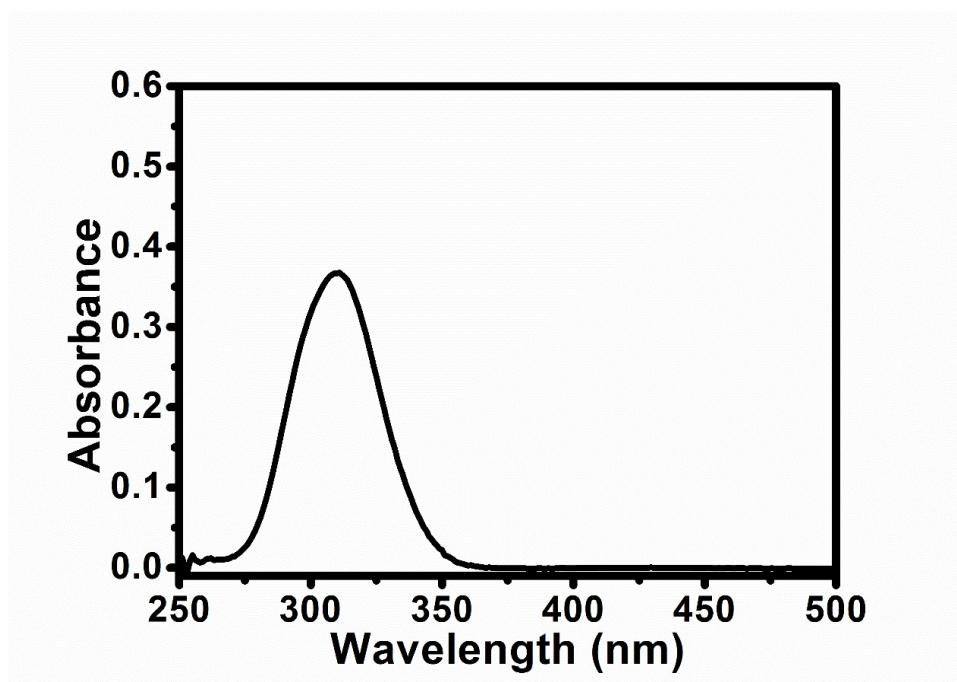

**Figure S4.** UV-vis spectrum of PV-OMe in DMSO, showing the typical UV absorption of the thiocarbonylthio group at the maximum of 305 nm.

## 2. PET-RAFT polymerization of *N*-Acryloyl-*L*-Val (*LV*)

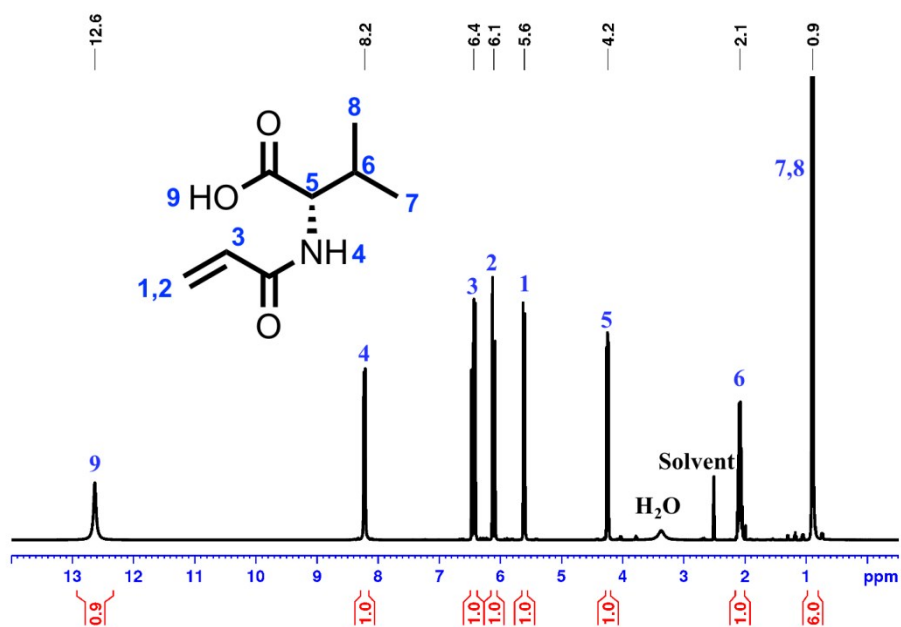

**Figure S5.**  $^1\text{H}$  NMR spectrum of *LV* monomer (400 MHz,  $\text{DMSO-}d_6$  as solvent).

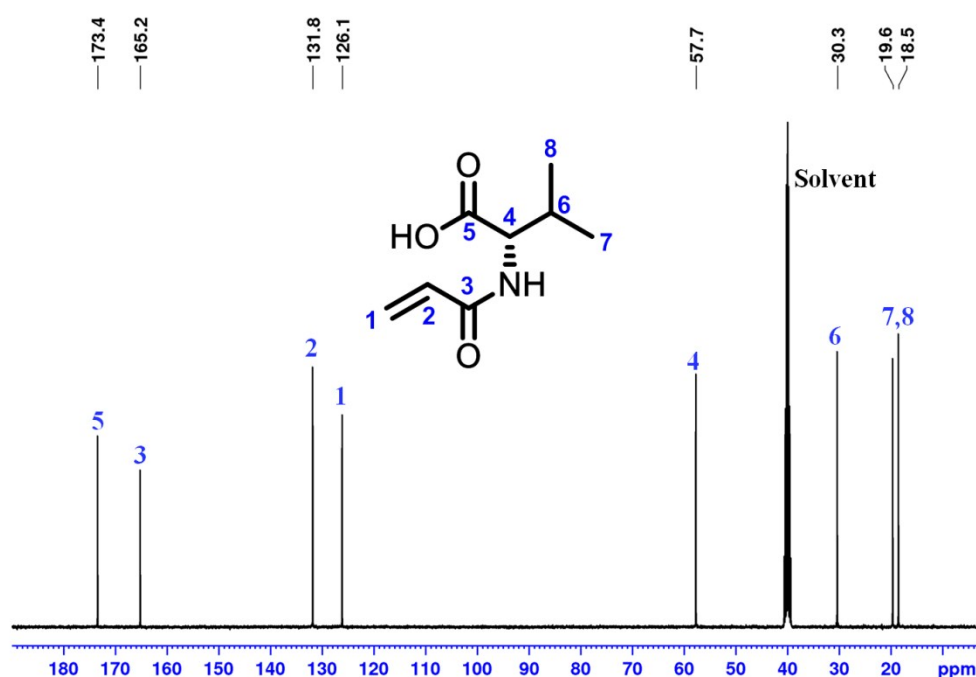

**Figure S6.**  $^{13}\text{C}$  NMR spectrum of LV monomer (100 MHz,  $\text{DMSO-}d_6$  as solvent).

**Table S1.** PET-RAFT polymerization of LV using different solvents.<sup>a</sup>

| # | Solvent | CTA   | [M]/[CTA]/[P<br>C]         | [I]/[M]<br>(ppm) | Time<br>(h) | $\alpha^b$<br>(%) | $M_{n,\text{GPC}}^c$<br>(g/mol) | $M_w/M_n$ |
|---|---------|-------|----------------------------|------------------|-------------|-------------------|---------------------------------|-----------|
| 1 | DMF     | DDMAT | 150:1:7.5 $\times 10^{-4}$ | 5                | 4           | 76                | 13 690                          | 1.40      |
| 2 | THF     | DDMAT | 150:1:7.5 $\times 10^{-4}$ | 5                | 4           | 60                | 10 560                          | 1.46      |
| 3 | Diox    | DDMAT | 150:1:7.5 $\times 10^{-4}$ | 5                | 4           | 93                | 19 220                          | 1.35      |

<sup>a</sup>The reactions were performed using  $\text{Ir}(\text{ppy})_3$  as catalyst under blue LED light irradiation ( $\lambda_{\text{max}} = 460 \text{ nm}$ ,  $0.7 \text{ mW/cm}^2$ ) at room temperature. <sup>b</sup>Monomer conversion determined by  $^1\text{H}$  NMR spectroscopy. <sup>c</sup>Molecular weight and dispersity determined by GPC analysis (DMAc used as eluent) using polymethyl methacrylate (PMMA) standards for calibration. The resulting polymer was methylated using  $\text{TMSCHN}_2$ .

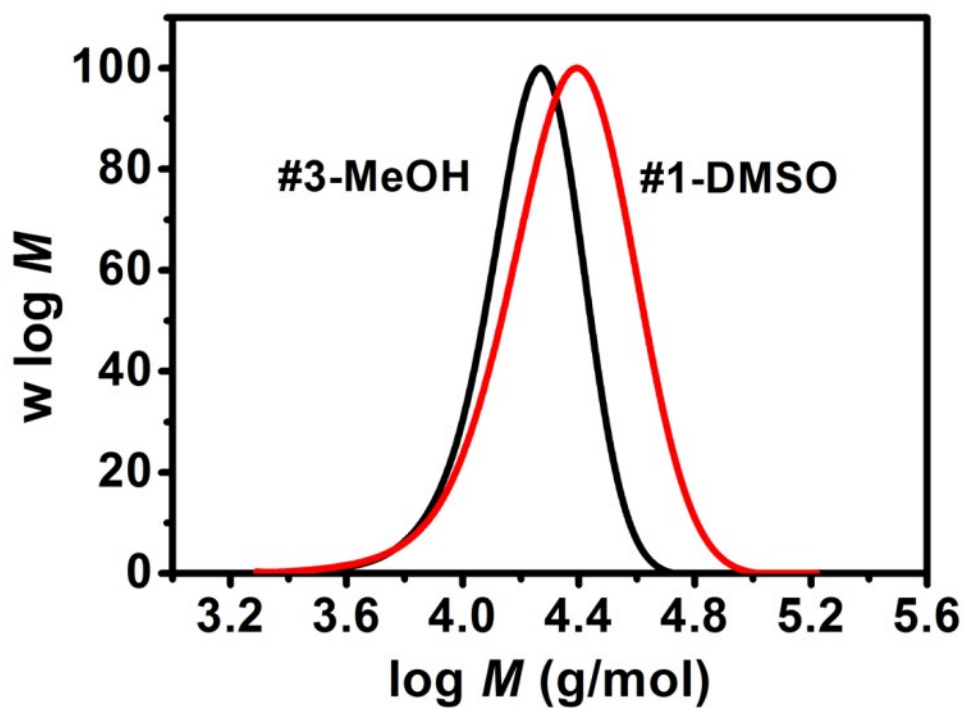

**Figure S7.** GPC curves for poly(LV) (PLV)s prepared in DMSO and MeOH (#1 and #3 in Table 2).

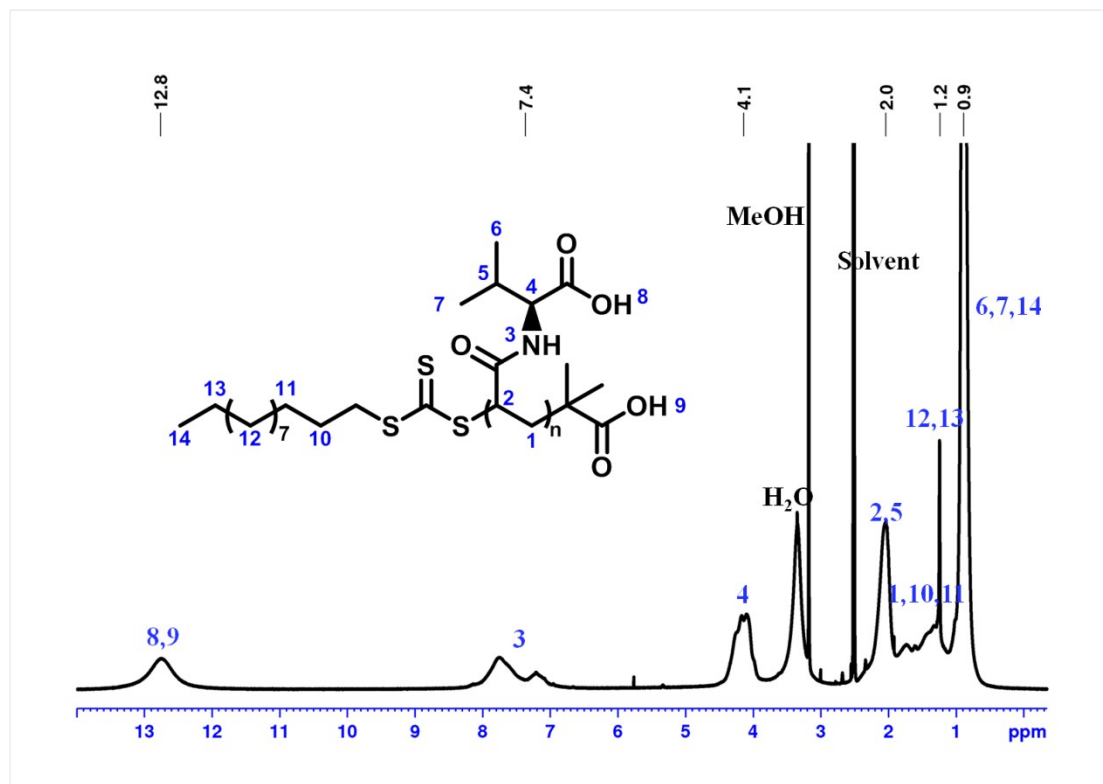

**Figure S8.**  $^1\text{H}$  NMR spectrum of poly(LV) (PLV) (400 MHz,  $\text{DMSO-}d_6$  as solvent).

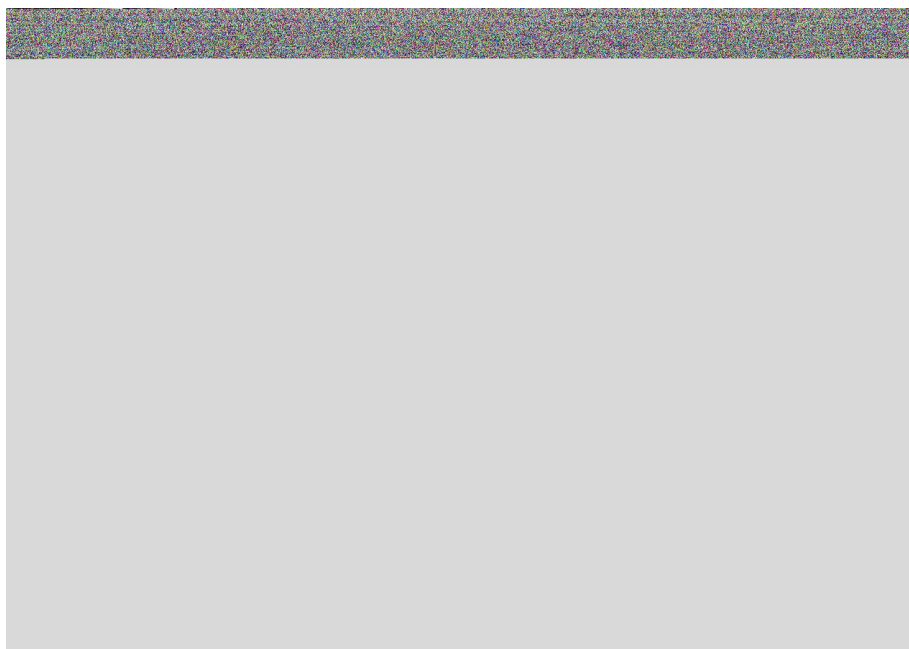

**Figure S9.** UV-vis spectrum of PLV in DMSO, showing the typical UV absorption of the thiocarbonylthio group at the maximum of 305 nm.

### 3. PET-RAFT polymerization of *N*-Acryloyl-*D*-Phe (DF)

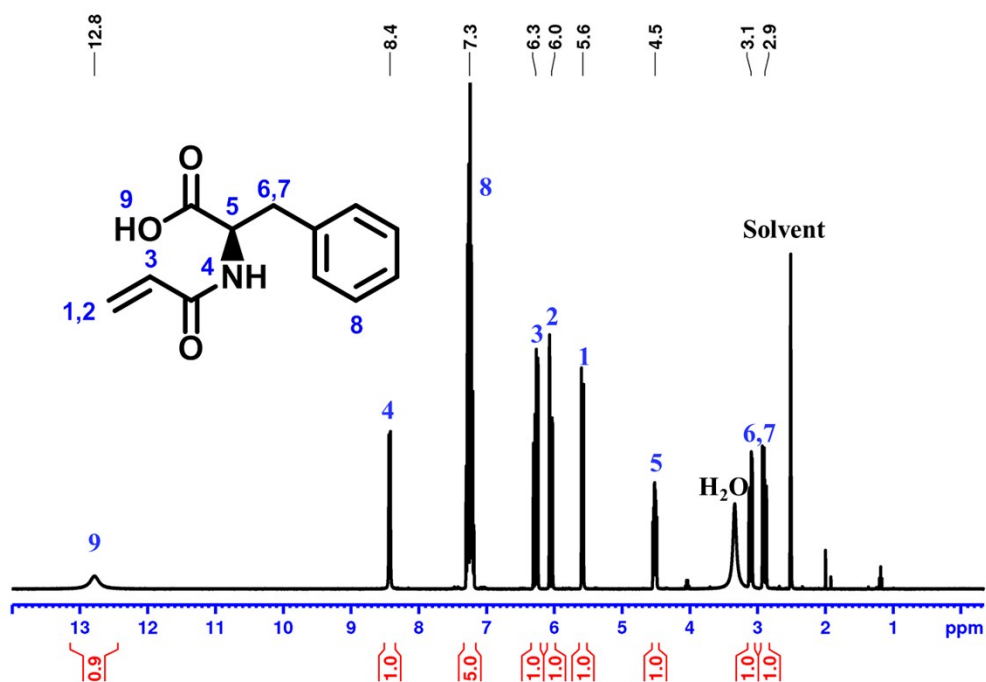

**Figure S10.** <sup>1</sup>H NMR spectrum of DF monomer (400 MHz, DMSO-*d*<sub>6</sub> as solvent).

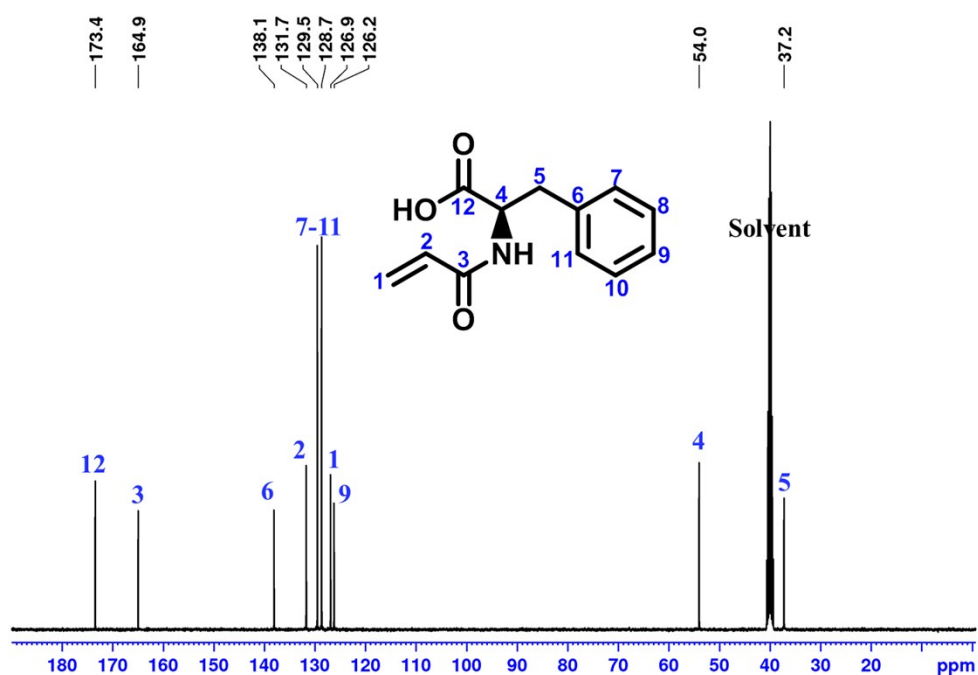

**Figure S11.** <sup>13</sup>C NMR spectrum of DF monomer (100 MHz, DMSO-*d*<sub>6</sub> as solvent).

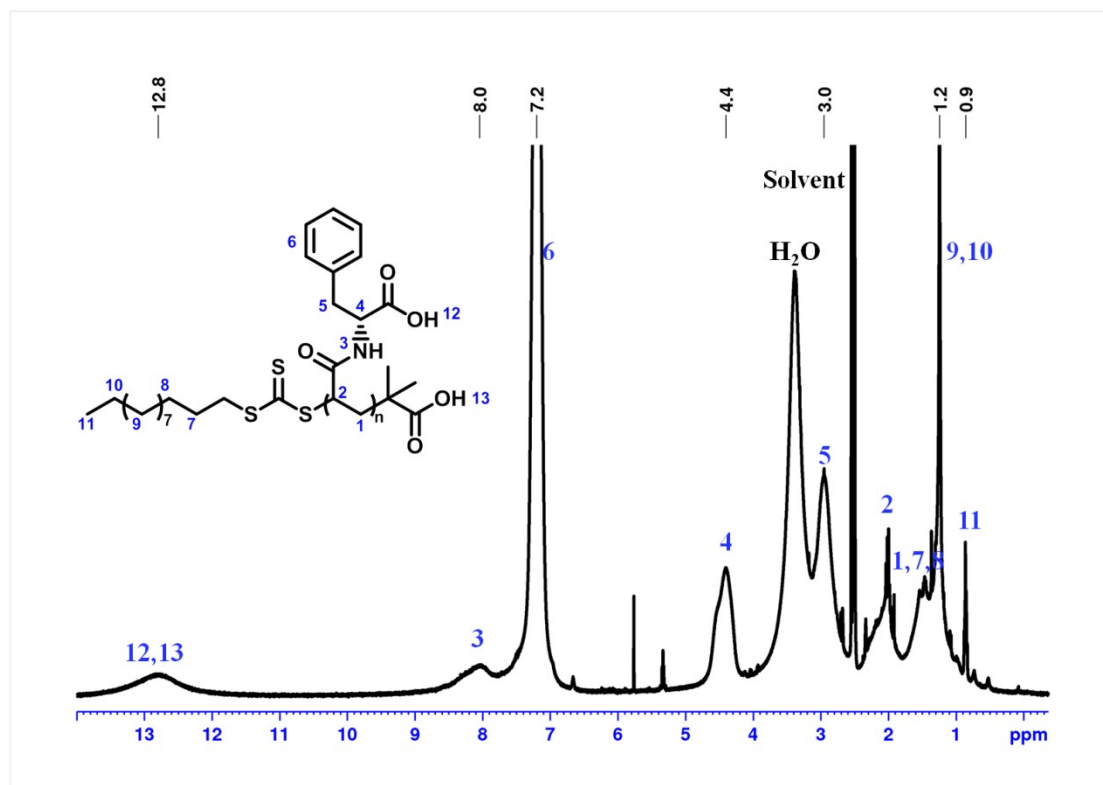

**Figure S12.** <sup>1</sup>H NMR spectrum of poly(DF) (PDF) (400 MHz, DMSO-*d*<sub>6</sub> as solvent).

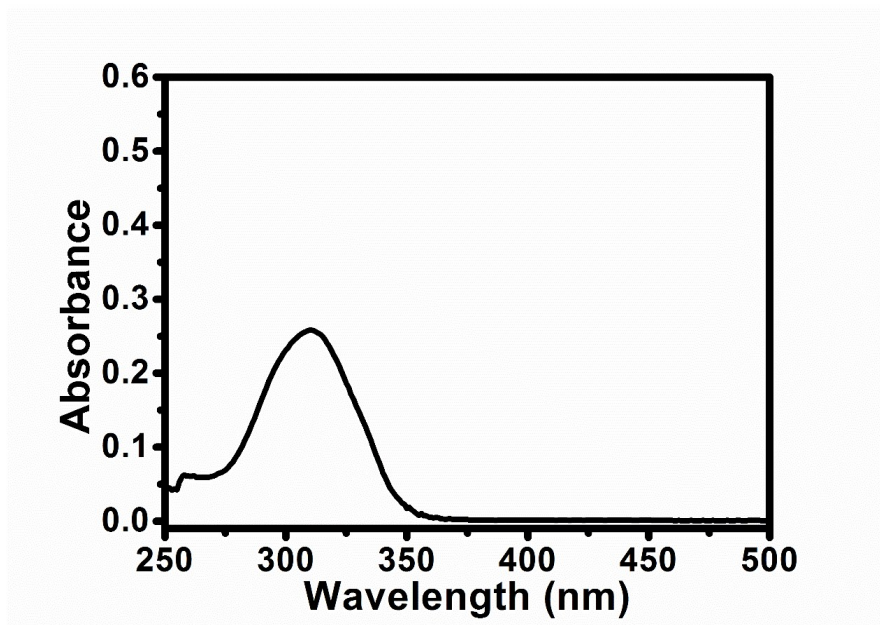

**Figure S13.** UV-vis spectrum of PDF in DMSO, showing the typical UV absorption of the thiocarbonylthio group at the maximum of 305 nm.

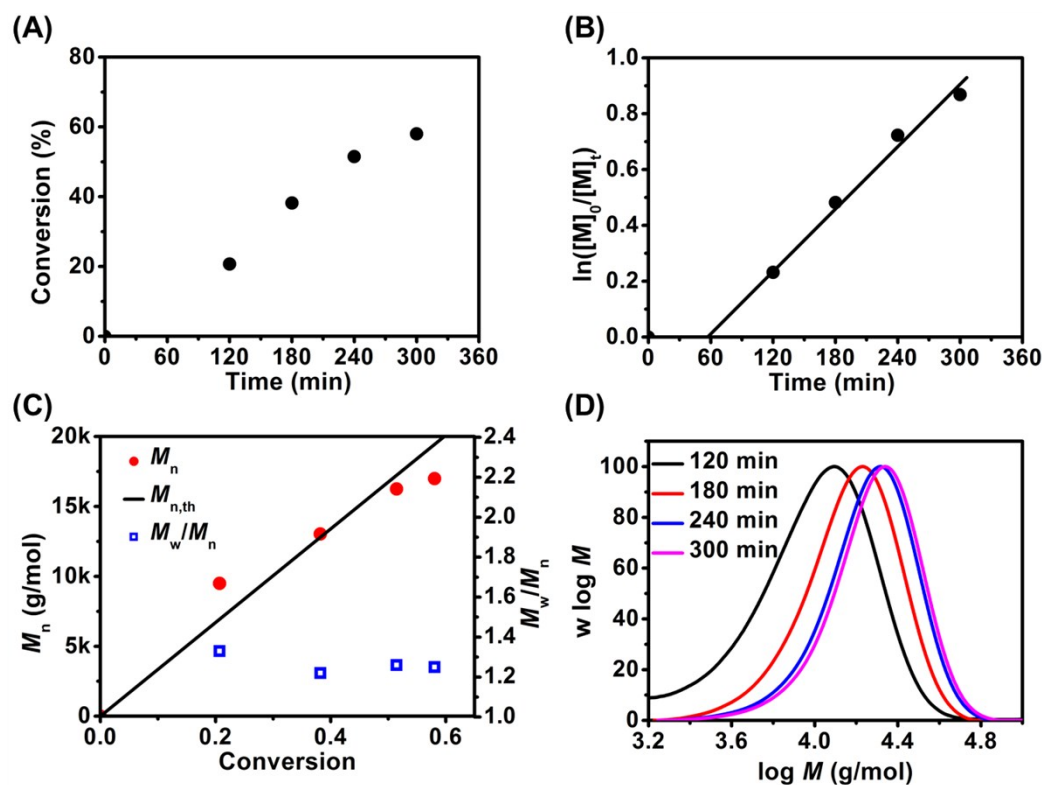

**Figure S14.** Kinetic study of the PET-RAFT polymerization of DF using DDMAT as the CTA and Ir(ppy)<sub>3</sub> as catalyst under blue light irradiation ( $\lambda_{\max} = 460$  nm, 0.7 mW/cm<sup>2</sup>), a molar ratio of  $[DF]/[DDMAT]/[Ir(ppy)_3] = 150:1:7.5 \times 10^{-4}$  in MeOH. (A) Monomer conversion versus polymerization time. (B)  $\ln([M]_0/[M]_t)$  versus polymerization time. (C)  $M_n$ , GPC and  $M_w/M_n$  versus monomer conversion. (D)

Molecular weight distributions at different polymerization time intervals. The resulting polymer was methylated by  $\text{TMSCHN}_2$ .

#### 4. PET-RAFT polymerization of *N*-Acryloyl-*L*-Ser (*LS*)

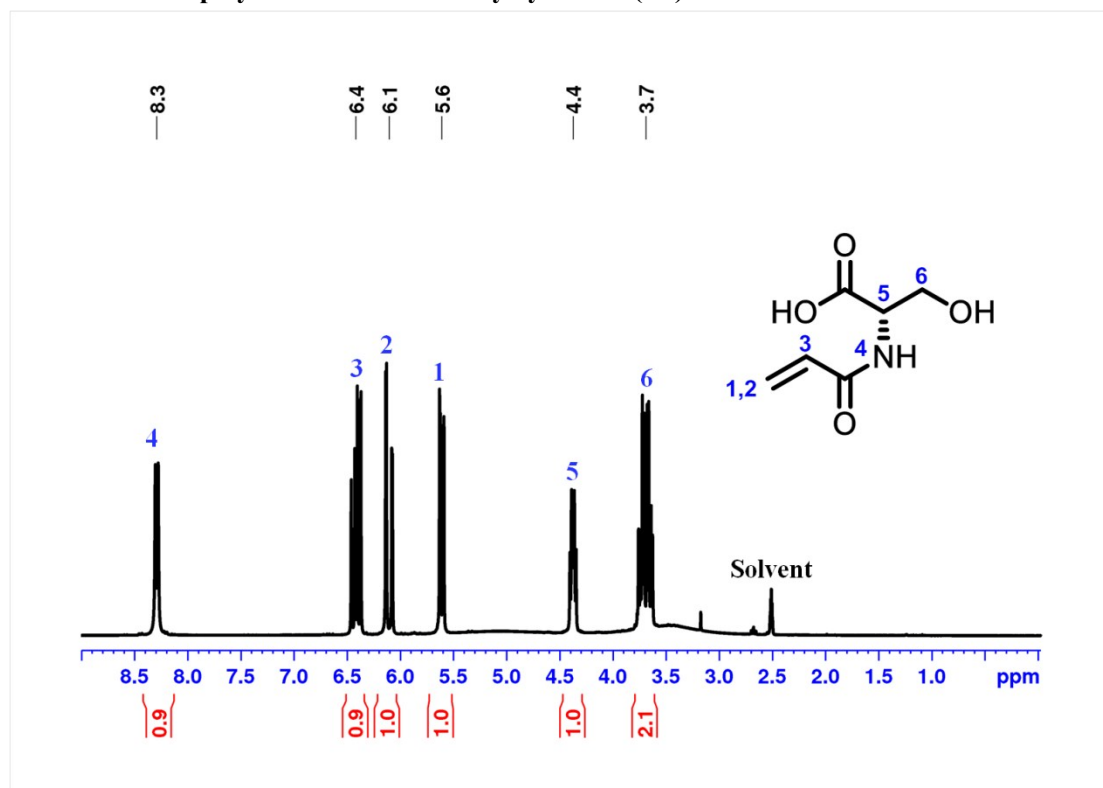

**Figure S15.** <sup>1</sup>H NMR spectrum of *LS* monomer (400 MHz, DMSO-*d*<sub>6</sub> as solvent).

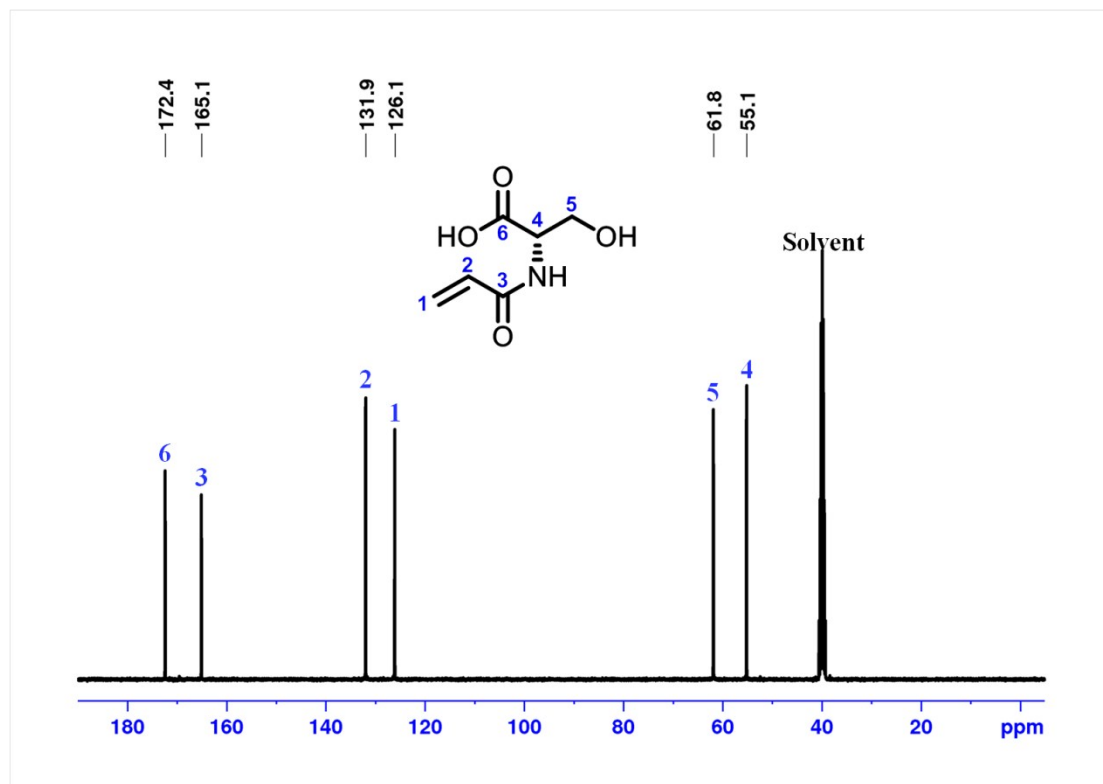

**Figure S16.**  $^{13}\text{C}$  NMR spectrum of *LS* monomer (100 MHz,  $\text{DMSO-}d_6$  as solvent).

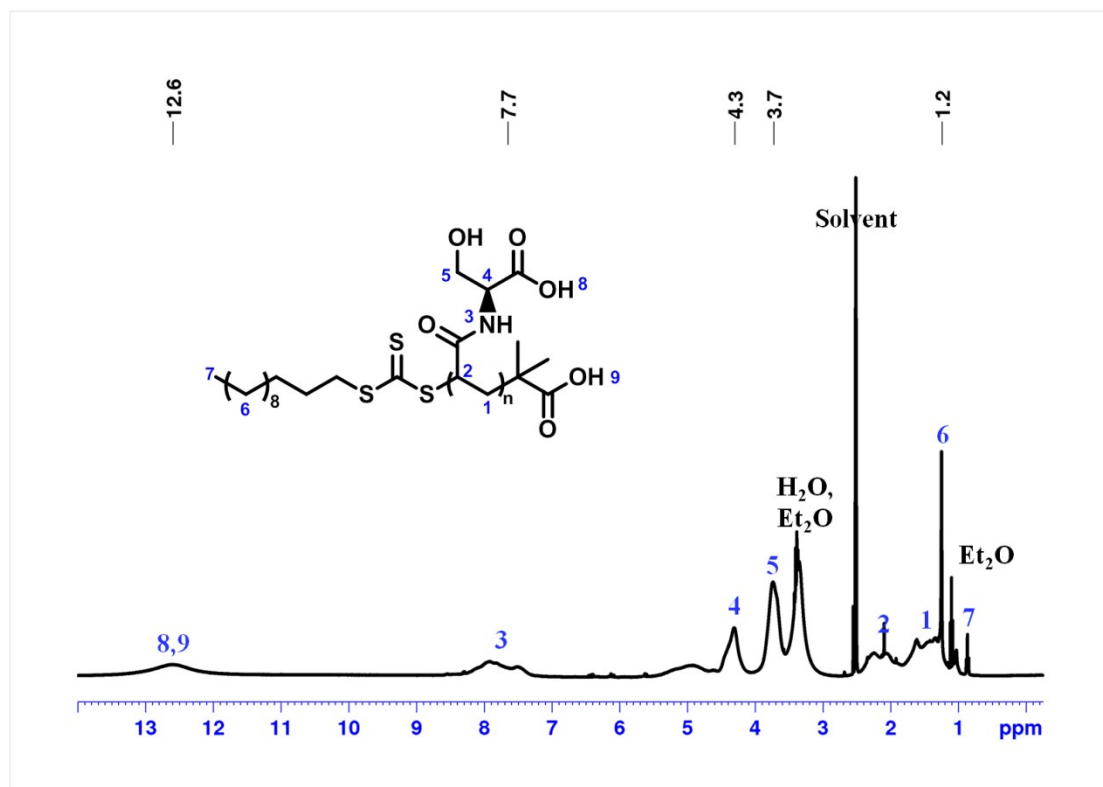

**Figure S17.**  $^1\text{H}$  NMR spectrum of poly(*LS*) (PLS) (400 MHz,  $\text{DMSO-}d_6$  as solvent)

## 5. PET-RAFT polymerization of *N*-Acryloyl-*D*-Asp (*DD*)

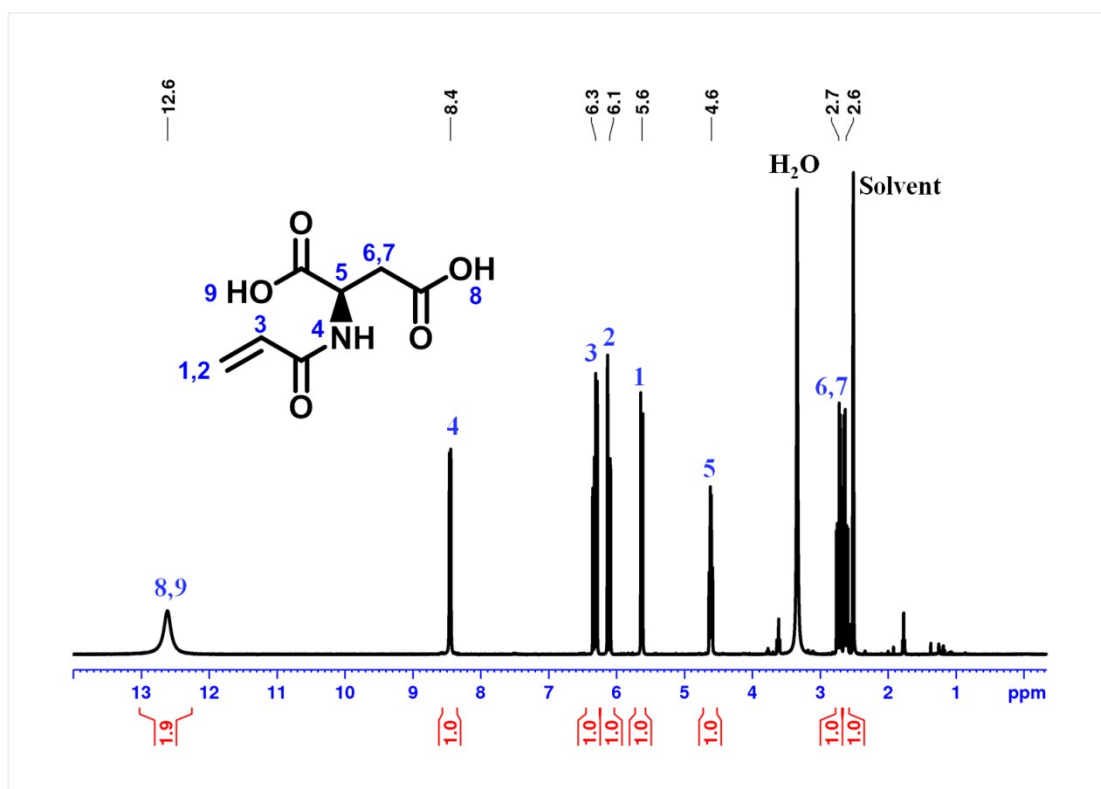

**Figure S18.**  $^1\text{H}$  NMR spectrum of DD monomer (400 MHz,  $\text{DMSO}-d_6$  as solvent).

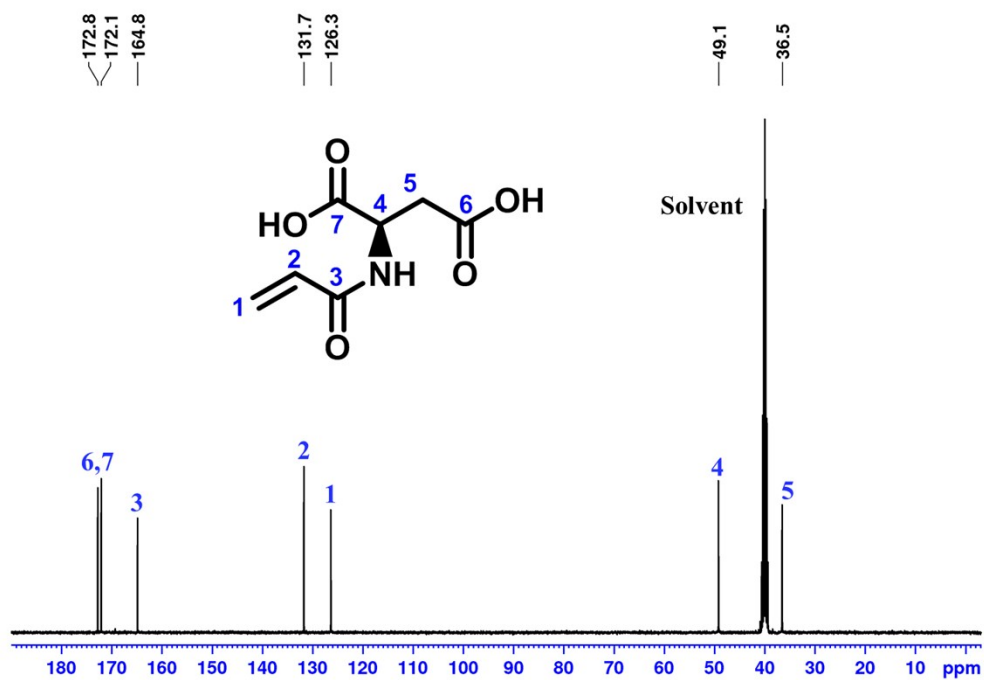

**Figure S19.**  $^{13}\text{C}$  NMR spectrum of DD monomer (100 MHz,  $\text{DMSO}-d_6$  as solvent).

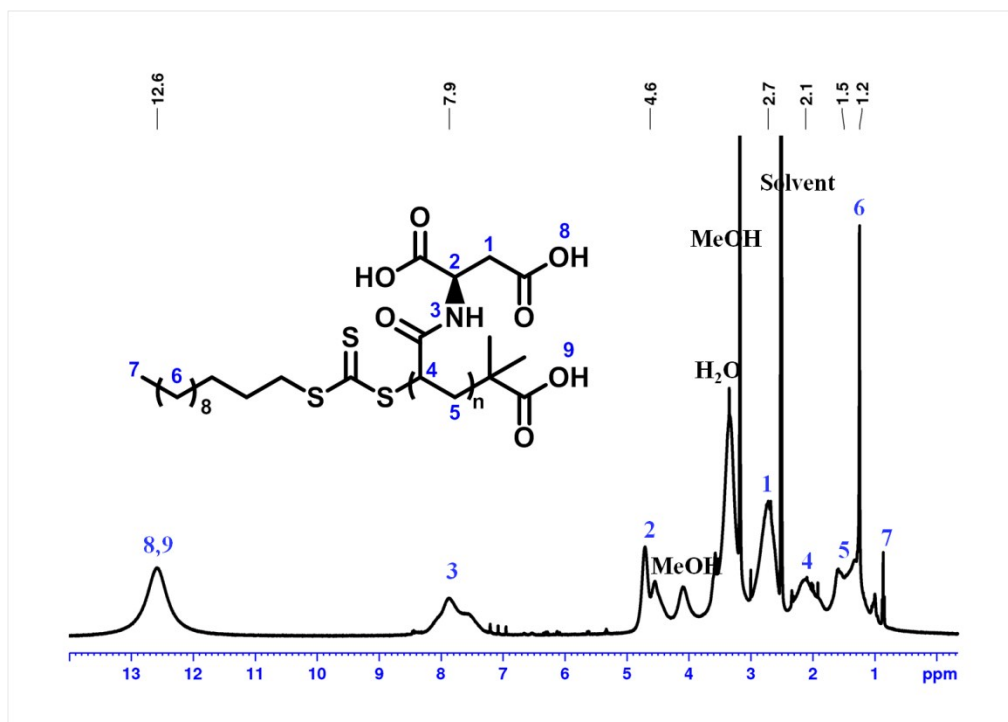

**Figure S20.**  $^1\text{H}$  NMR spectrum of poly(DD) (PDD) (400 MHz,  $\text{DMSO}-d_6$  as solvent).

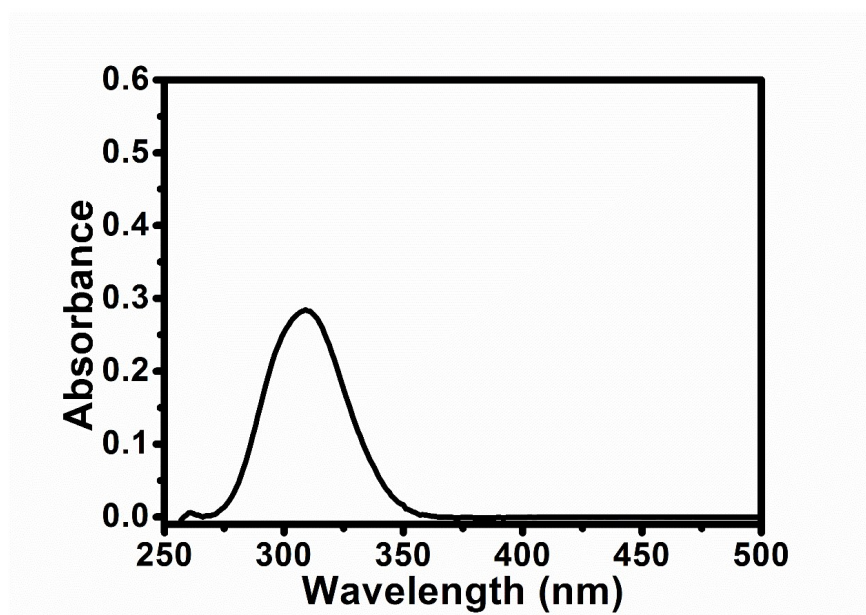

**Figure S21.** UV-vis spectrum of PDD in DMSO, showing the typical UV absorption of the thiocarbonylthio group at the maximum of 305 nm.

**Table S2.** Thermally initiated RAFT polymerization of DD using AIBN as catalyst.<sup>a</sup>

| # | Catalyst | CTA   | [M]/[CTA]/[P<br>C] | Time<br>(h) | <i>a</i> <sup>b</sup><br>(%) | <i>M</i> <sub>n, GPC</sub> <sup>c</sup><br>(g/mol) | <i>M</i> <sub>w</sub> / <i>M</i> <sub>n</sub> |
|---|----------|-------|--------------------|-------------|------------------------------|----------------------------------------------------|-----------------------------------------------|
| 1 | AIBN     | DDMAT | 150:1:1            | 8           | 93                           | 19 650                                             | 1.24                                          |
| 2 | AIBN     | DDMAT | 150:1:0.5          | 16          | 88                           | 18 550                                             | 1.20                                          |

<sup>a</sup>The reactions were performed using AIBN as catalyst at 60 °C. <sup>b</sup>Monomer conversion determined by <sup>1</sup>H NMR spectroscopy. <sup>c</sup>Molecular weight and dispersity determined by GPC analysis (DMAc used as eluent) using polymethyl methacrylate (PMMA) standards for calibration. The resulting polymer was methylated using TMSCHN<sub>2</sub>.

*Experimental procedure for thermally initiated RAFT polymerization:* A reaction stock solution consisting of MeOH (0.65 mL), *N*-Acryloyl-*D*-Asp (100 mg, 0.54 mmol), DDMAT (1.26 mg, 0.0036 mmol) and AIBN (0.59 mg, 0.0036 mmol) was prepared in a 4 mL glass vial. The glass vial was sealed with a rubber septum, and the reaction mixture was degassed with nitrogen for 20 minutes. The glass vial was stirred in an oil bath at 60 °C for 8 h. The other polymerization was performed in the presence of half amount of AIBN (0.3 mg, 0.0018 mmol) under otherwise identical conditions.

## 6. PET-RAFT polymerization of *N*-Acryloyl-*L*-Glu (LE)

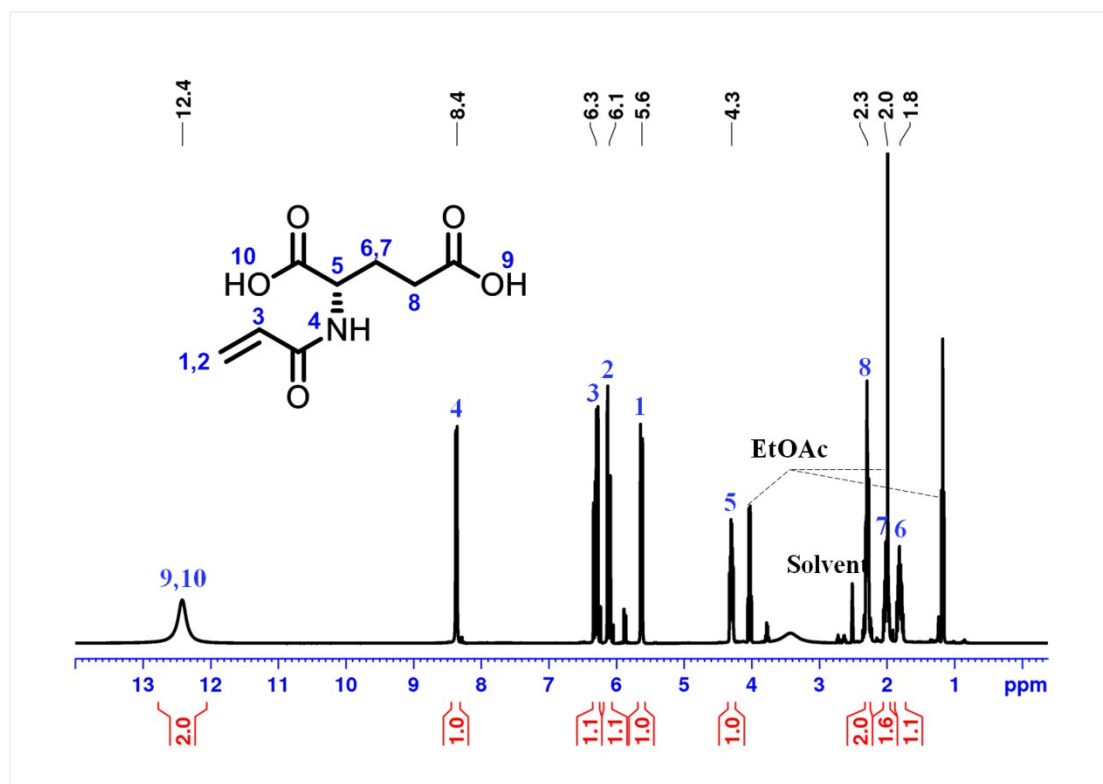

**Figure S22.**  $^1\text{H}$  NMR spectrum of LE monomer (400 MHz,  $\text{DMSO}-d_6$  as solvent).

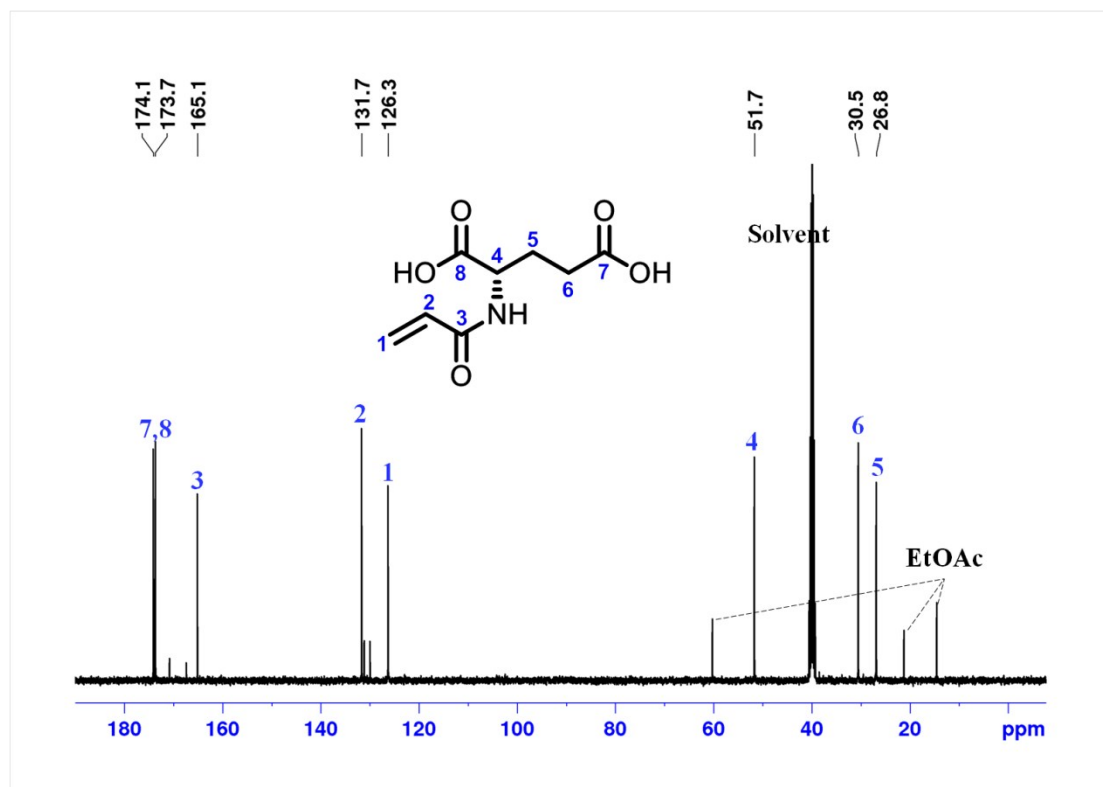

**Figure S23.**  $^{13}\text{C}$  NMR spectrum of LE monomer (100 MHz,  $\text{DMSO}-d_6$  as solvent).

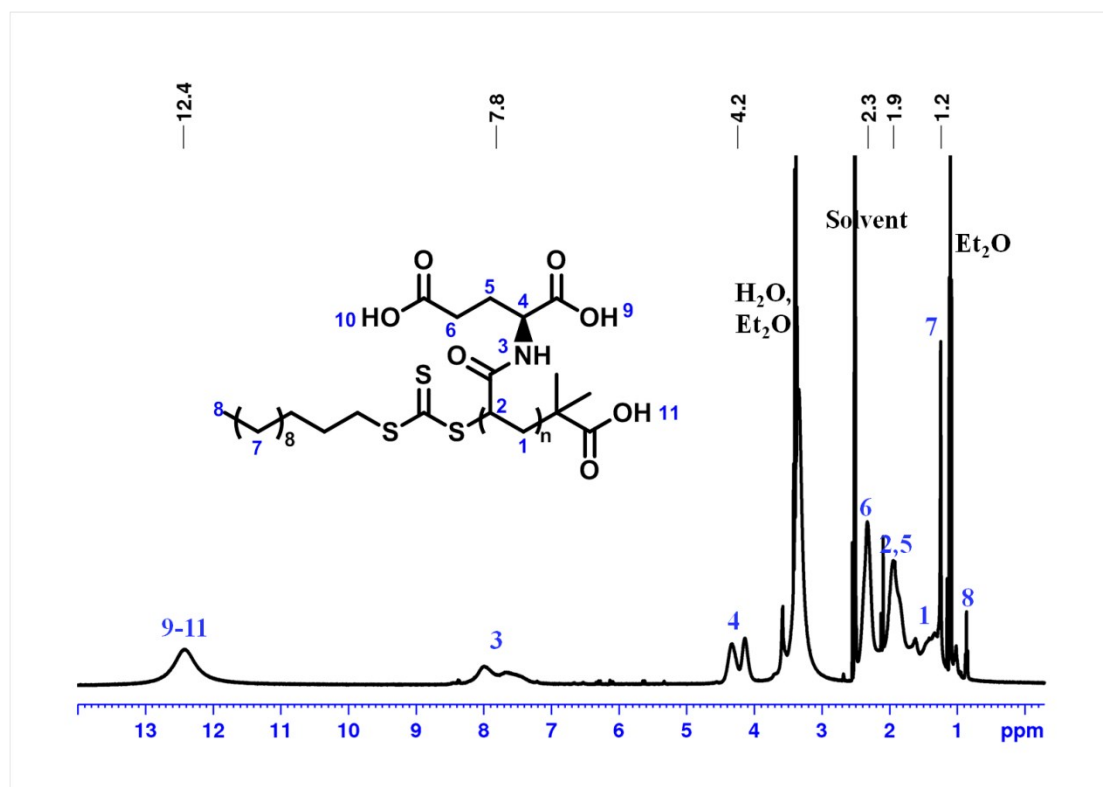

**Figure S24.**  $^1\text{H}$  NMR spectrum of poly(LE) (PLE) (400 MHz,  $\text{DMSO}-d_6$  as solvent).

## 7. PET-RAFT polymerization of *N*-Acryloyl-*L*-Glu-*O**t*Bu (*LE-OtBu*)

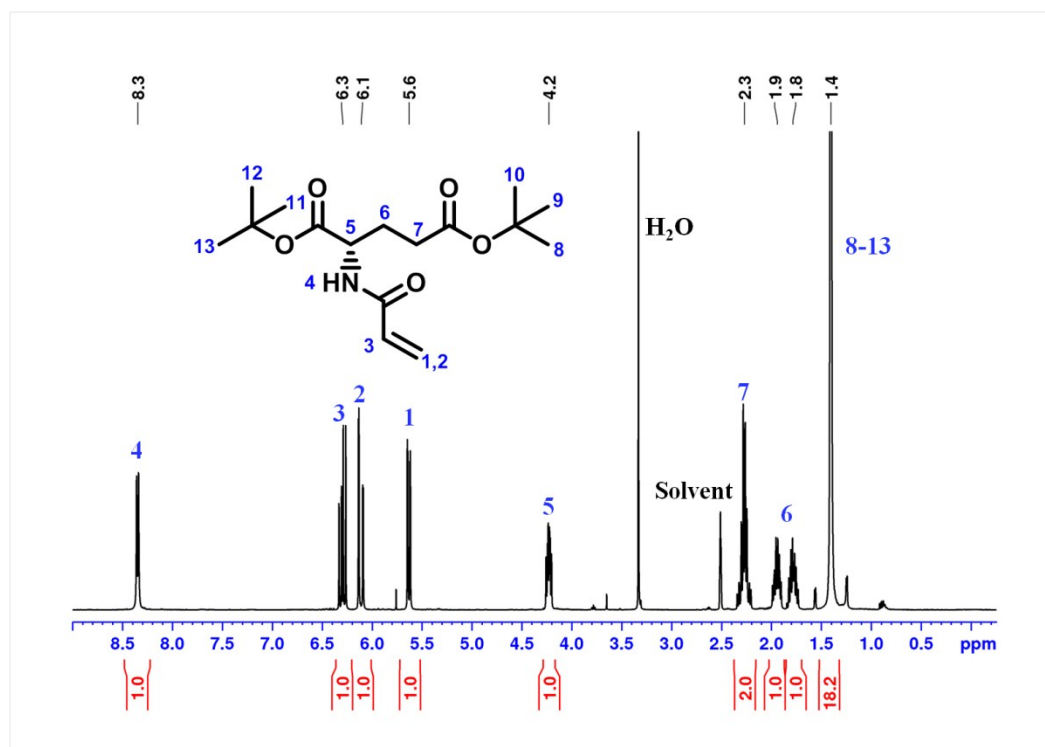

**Figure S25.** <sup>1</sup>H NMR spectrum of *LE-OtBu* monomer (400 MHz, DMSO-*d*<sub>6</sub> as solvent).

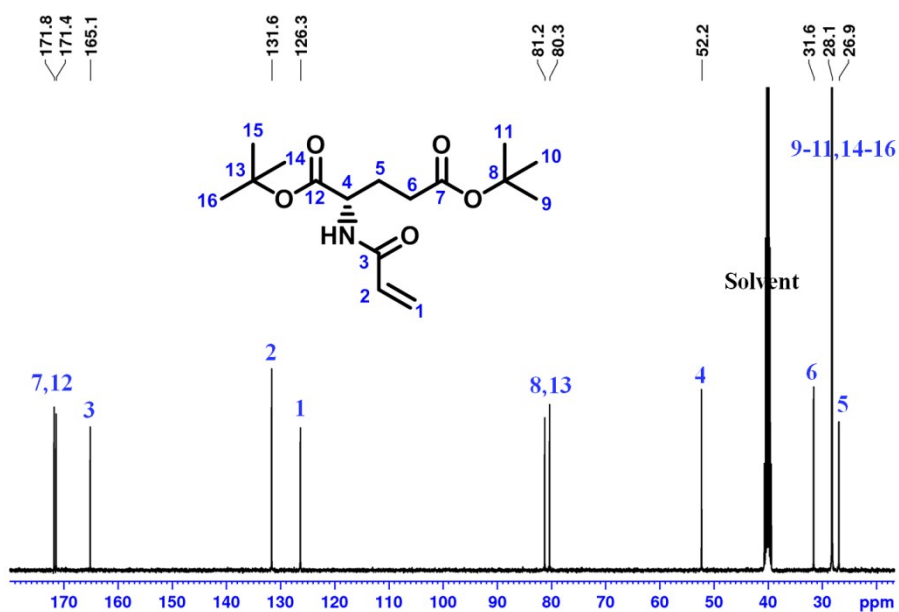

**Figure S26.**  $^{13}\text{C}$  NMR spectrum of *LE-OtBu* monomer (100 MHz,  $\text{DMSO-}d_6$  as solvent).

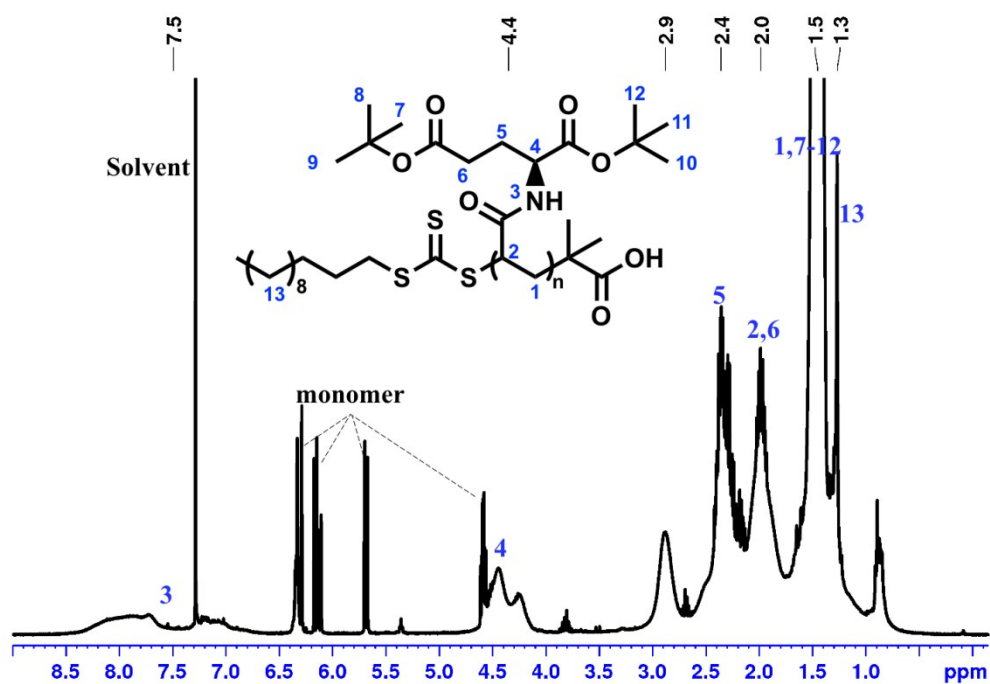

**Figure S27.**  $^1\text{H}$  NMR spectrum of poly(*LE-OtBu*) (*PLE-OtBu*) (400 MHz,  $\text{CDCl}_3$  as solvent).

## 8. Chain extension of various *N*-acryloyl amino acid monomers

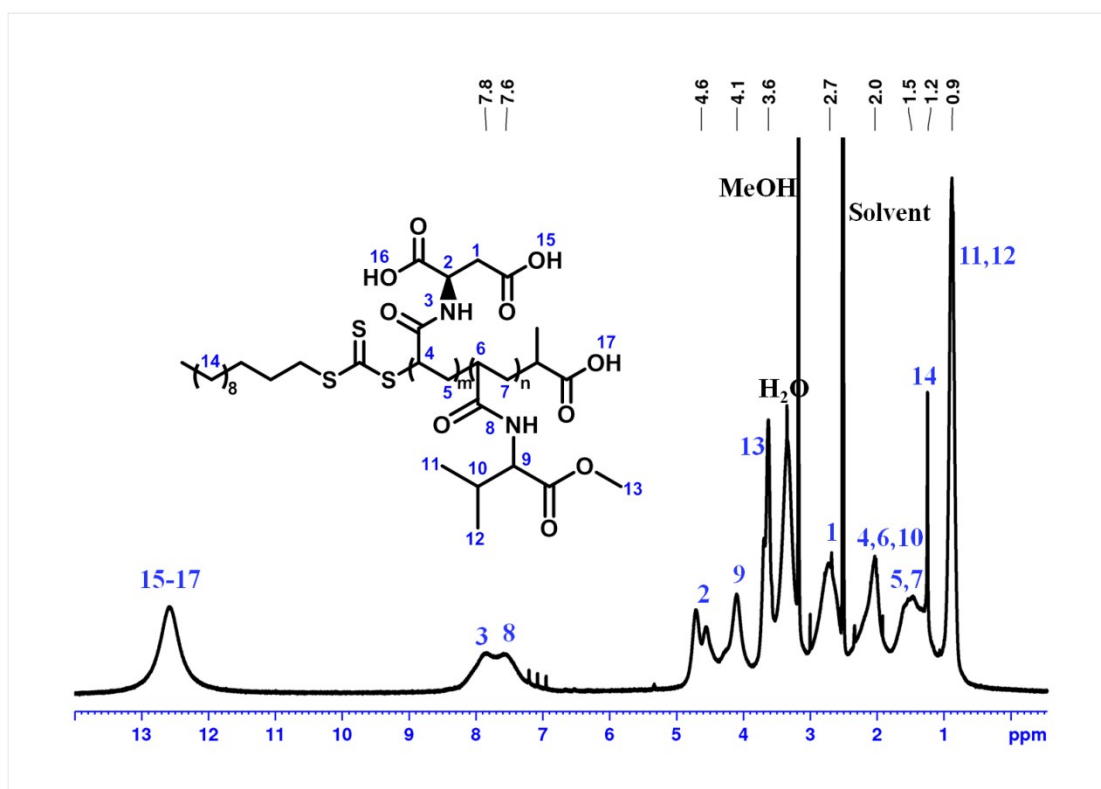

**Figure S28.**  $^1\text{H}$  NMR spectrum of poly(V-OMe)-*b*-poly(DD) (PV-OMe-*b*-PDD) (400 MHz, DMSO- $d_6$  as solvent).

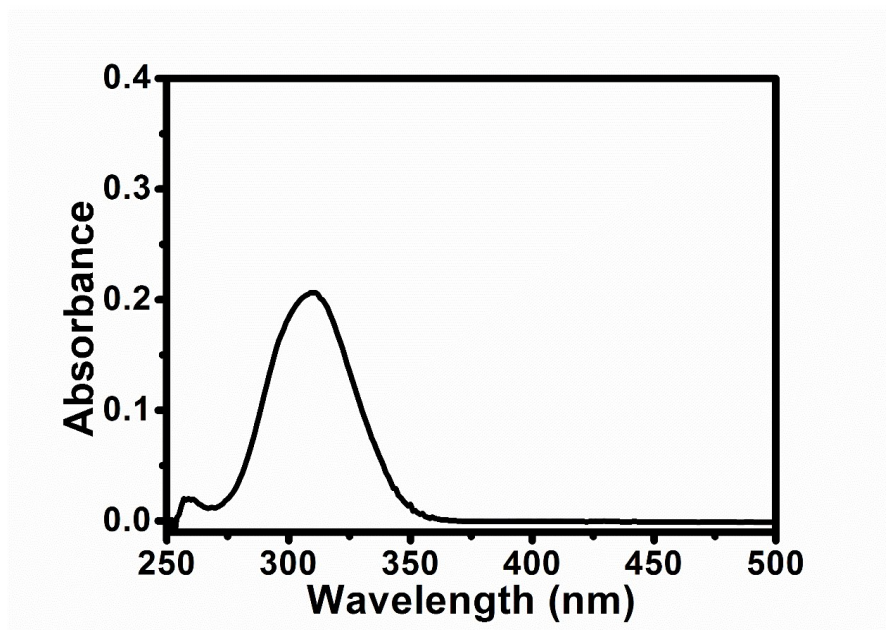

**Figure S29.** UV-vis spectrum of PV-OMe-*b*-PDD in DMSO, showing the typical UV absorption of the thiocarbonylthio group at the maximum of 305 nm.
